# Supplementary material for: Pentagonal B2C monolayer with extremely high theoretical capacity for Li-/Na-ion batteries
Source: Royal Society of Chemistry journal article supplement (doi:10.1039/d0cp06363k), 2021-01-01
Supplement: d0cp06363k1.pdf [file d0cp06363k1.pdf]

*Supporting Information for*

**Pentagonal B<sub>2</sub>C monolayer with offering extremely high  
theoretical capacity for Li-/Na-ion batteries**

Zishuang Cheng,<sup>a,b</sup> Xiaoming Zhang,<sup>a,b,c\*</sup> Hui Zhang,<sup>a,b</sup> Jianbo Gao,<sup>d</sup> Heyan Liu,<sup>a,b,c</sup> Xiao Yu,<sup>a,b</sup>  
Xuefang Dai,<sup>a,b</sup> Guodong Liu,<sup>a,b\*</sup> and Guifeng Chen<sup>a,b\*</sup>

<sup>a</sup>State Key Laboratory of Reliability and Intelligence of Electrical Equipment, Hebei University of Technology, Tianjin 300130, China.

<sup>b</sup>School of Materials Science and Engineering, Hebei University of Technology, Tianjin 300130, China.

<sup>c</sup>State Key Laboratory of Baiyunobo Rare Earth Resource Researches and Comprehensive Utilization, Baotou Research Institute of Rare Earths, Baotou, 014030, China.

<sup>d</sup>Centre of Excellence for Advanced Materials, Dongguan 523808, China.

E-mail: zhangxiaoming87@hebut.edu.cn; gdliu1978@126.com; cgfchen@hebut.edu.cn.

## **Contents of Supporting Information**

1. Evolution of the potential energy versus simulation time for Penta-B<sub>2</sub>C before and after adsorption Li/Na during AIMD simulations. (Figure S1)
2. Changes of potential energy with the distance between a single Li/Na atom and Penta-B<sub>2</sub>C. (Figure S2)

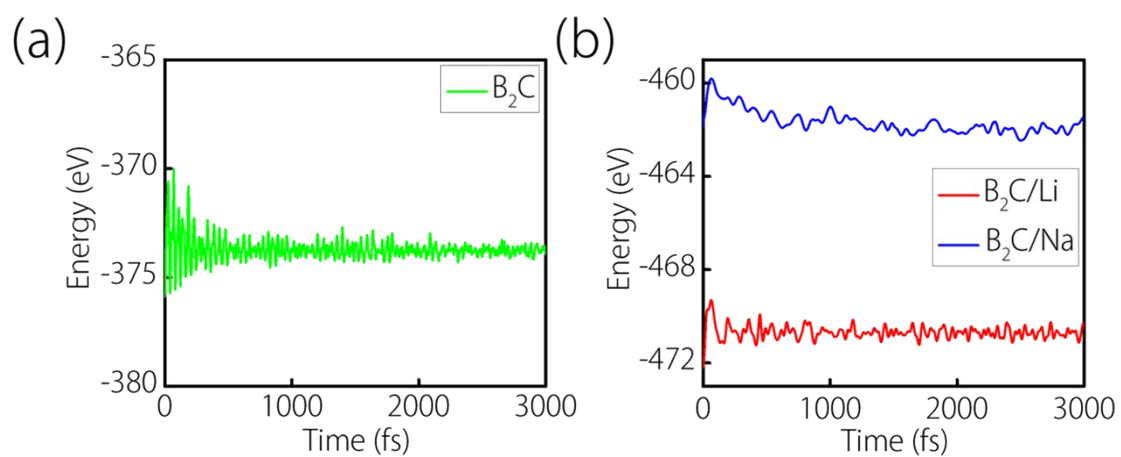

Figure S1 Evolution of the potential energy versus simulation time for Penta-B<sub>2</sub>C (a) before and (b) after adsorption Li/Na during AIMD simulations at the temperature of 300 K.

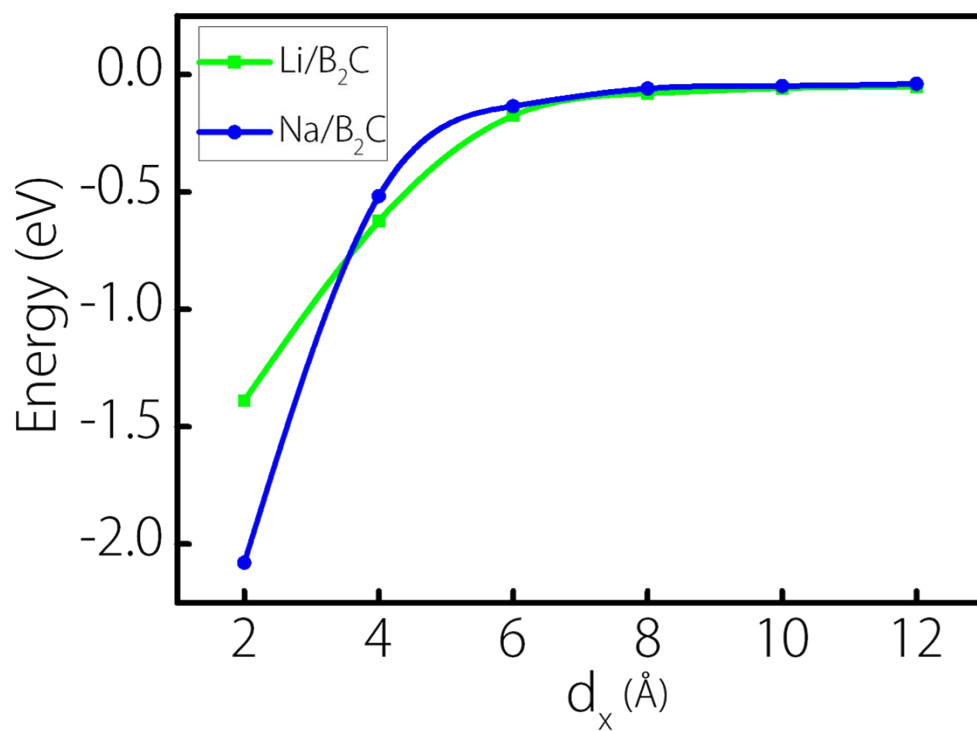

Figure S2 Changes of potential energy with the distance between a single Li/Na atom and Penta-B<sub>2</sub>C.
